# INFOGRAPHICS IN ANESTHESIOLOGY

Complex Information for Anesthesiologists Presented Quickly and Clearly

## Continuous Postoperative Monitoring: Validation of the Next Frontier

Up to 60% of patients who suffer cardiac arrest on the hospital wards have abnormal vital signs hours before the event.<sup>1</sup> Wearable monitors could detect those abnormalities, but they have undergone limited real-world validation.

**Breteler *et al.*<sup>2</sup> monitored 25 high-risk patients after surgery, comparing 4 wearable devices to reference intensive care-grade bedside monitoring. They analyzed a total of 720 h of vital signs.**

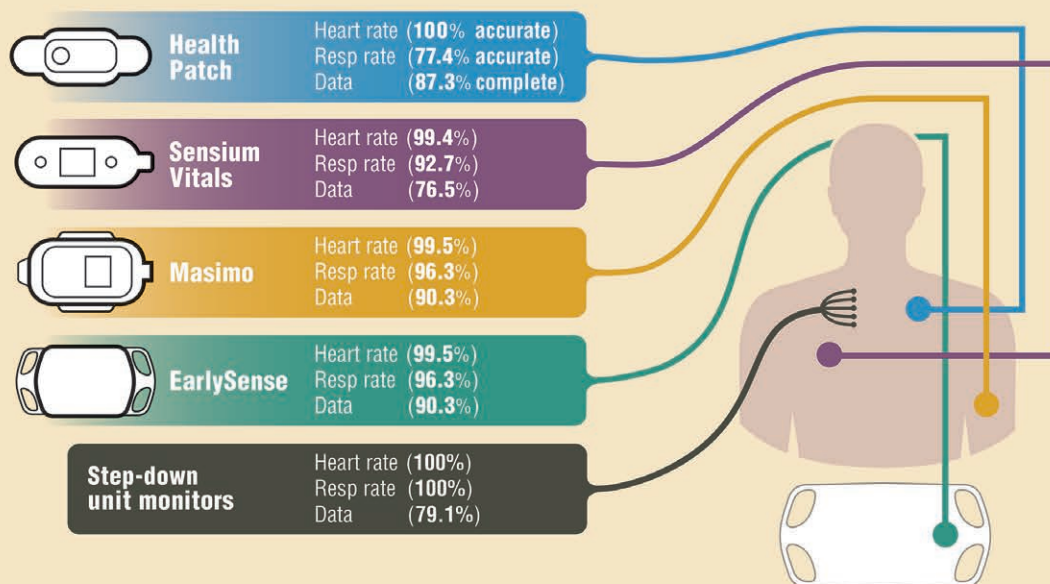

**Most wearable devices<sup>3</sup> were highly accurate for determining both heart rate and respiratory rate. Next steps in using these devices should focus on:**

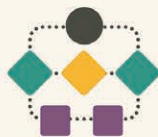

Workflow integration

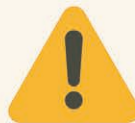

Alarm management

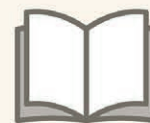

Education

Accuracy was defined as the percentage of paired data elements in zone A or B of the Clarke Error Grid. Data completeness was defined as the percentage of total monitoring time for which data were received, averaging heart rate and resp (respiratory) rate.

Infographic created by Jonathan P. Wanderer, Vanderbilt University Medical Center, and James P. Rathmell, Brigham and Women's Health Care/Harvard Medical School. Illustration by Annemarie Johnson, Vivo Visuals. Address correspondence to Dr. Wanderer: [jon.wanderer@vumc.org](mailto:jon.wanderer@vumc.org).

1. Saugel B, Hoppe P, Khanna AK: Automated continuous noninvasive ward monitoring: Validation of measurement systems is the real challenge. *ANESTHESIOLOGY* 2020; 132:407–10

2. Breteler MJM, KleinJan EJ, Dohmen DAJ, Leenen LPH, van Hillegersberg R, Ruurda JP, van Loon K, Blokhuis TJ, Kalkman CJ: Vital signs monitoring with wearable sensors in high-risk surgical patients: A clinical validation study. *ANESTHESIOLOGY* 2020; 132:424–39

3. Taenzler AH, Spence BC: The afferent limb of rapid response systems: Continuous monitoring on general care units. *Crit Care Clin* 2018; 34:189–98
